# Supplementary material for: permGPU: Using graphics processing units in RNA microarray association studies
Source: Springer Nature journal article supplement (doi:10.1186/1471-2105-11-329), 2010-06-16

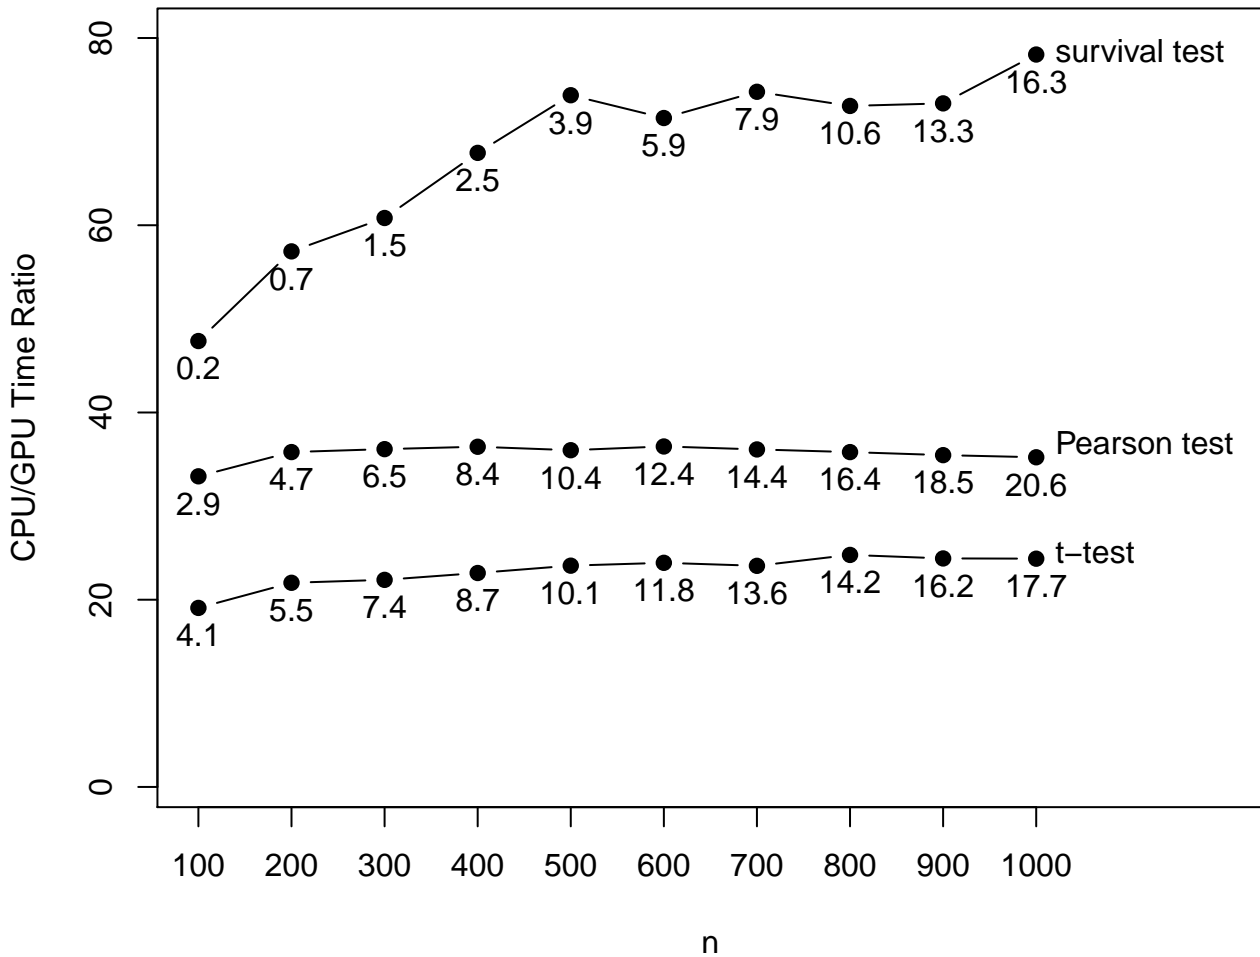

Supplement: 12859_2010_3786_MOESM2_ESM.pdf [file 12859_2010_3786_MOESM2_ESM.pdf]
