# Supplementary material for: permGPU: Using graphics processing units in RNA microarray association studies
Source: BMC Bioinformatics. 2010 Jun 16;11:329. doi: 10.1186/1471-2105-11-329 (PMC2910023; doi:10.1186/1471-2105-11-329)
Supplement: Additional file 1 — Supplementary Material for: "permGPU: Using graphics processing units in RNA microarray association studies". The compressed tar archive contains the source code for the examples discussed in "permGPU: Using graphics processing units in RNA microarray association studies" by Shterev et al. It also contains a tutorial for compiling and executing the code. The development version of the code is available for download from http://code.google.com/p/permgpu/. [file 1471-2105-11-329-S1.GZ]

Archive with 6 entries (5 files):
- permGPU-supp-material
- permGPU-supp-material/dchallenge-preprocessing.pdf
- permGPU-supp-material/tutorial.pdf
- permGPU-supp-material/permGPU-standalone_0.11.tar.gz
- permGPU-supp-material/permGPU_0.11.tar.gz
- permGPU-supp-material/README.supp.material.txt
