# Supplementary material for: permGPU: Using graphics processing units in RNA microarray association studies
Source: BMC Bioinformatics. 2010 Jun 16;11:329. doi: 10.1186/1471-2105-11-329 (PMC2910023; doi:10.1186/1471-2105-11-329)
Supplement: Additional file 1 — Supplementary Material for: "permGPU: Using graphics processing units in RNA microarray association studies". The compressed tar archive contains the source code for the examples discussed in "permGPU: Using graphics processing units in RNA microarray association studies" by Shterev et al. It also contains a tutorial for compiling and executing the code. The development version of the code is available for download from http://code.google.com/p/permgpu/. [file 1471-2105-11-329-S1.GZ › permGPU-supp-material/README.supp.material.txt]

permGPU_0.11.tar.gz            : Source code to build the permGPU R 
                                 extension package
permGPU-standalone_0.11.tar.gz : CUDA source code for building GPU stand-alone
                                 application and C/C++ code for conducting timing
                                 analyses on the CPU
dchallenge-preprocessing.pdf   : Instructions for replicating the pre-processing steps 
                                 used in analyzing the case study in the paper (also
                                 see the supplementary tutorial).
tutorial.pdf                   : Tutorial for using the stand-alone application. The
                                 R extension package has its own internal documentation

Note                           : As indicated in dchallenge-preprocessing.pdf and 
                                 tutorial.pdf, the data needed to replicate the 
                                 case study, can be obtained from the project webpage
                                 http://code.google.com/p/permgpu/downloads/
